# Supplementary material for: Tuning architectural organization of eukaryotic P450 system to boost bioproduction in Escherichia coli
Source: PubMed Central journal article supplement — Nat Commun. 2024 Nov 19;15:10009. doi: 10.1038/s41467-024-54259-1 (PMC11577030; doi:10.1038/s41467-024-54259-1), 2024-11-19
Supplement: 41467_2024_54259_MOESM3_ESM.pdf [file 41467_2024_54259_MOESM3_ESM.pdf]

## Description of Additional Supplementary Files

File Name: Supplementary Data 1

Description: Plasmids used in this study.

File Name: Supplementary Data 2

Description: *E. coli* strains used in this study.

File Name: Supplementary Data 3

Description: Oligonucleotides used in this study.

File Name: Supplementary Data 4

Description: *E. coli* codon-optimized coding sequences used in this study.

File Name: Supplementary Data 5

Description: The encoded amino acid sequences of the fusion genes constructed in this study. In the tandem fused chimeras, the underlined peptide indicates the inserted linker. In C-terminus-tagged proteins for Western Blotting,  $\alpha$  refers to N-terminus-fused Met, 8RP, SpyCatcher, SpyTag, SnoopCatcher, SnoopTag, SH3 or SH3lig, while  $\beta$  refers to Met, 8RP, SpyTag, SpyTag<sup>mut</sup>, SpyCatcher, SnoopTag, SnoopCatcher, SH3lig or SH3 used in Supplementary Fig. 8.
