# Supplementary material for: Tuning architectural organization of eukaryotic P450 system to boost bioproduction in Escherichia coli
Source: PubMed Central journal article supplement — Nat Commun. 2024 Nov 19;15:10009. doi: 10.1038/s41467-024-54259-1 (PMC11577030; doi:10.1038/s41467-024-54259-1), 2024-11-19
Supplement: 41467_2024_54259_MOESM9_ESM.pdf [file 41467_2024_54259_MOESM9_ESM.pdf]

## Reporting Summary

Nature Portfolio wishes to improve the reproducibility of the work that we publish. This form provides structure for consistency and transparency in reporting. For further information on Nature Portfolio policies, see our [Editorial Policies](#) and the [Editorial Policy Checklist](#).

### Statistics

For all statistical analyses, confirm that the following items are present in the figure legend, table legend, main text, or Methods section.

- |                                     |                                                                                                                                                                                                                                                                                                |
|-------------------------------------|------------------------------------------------------------------------------------------------------------------------------------------------------------------------------------------------------------------------------------------------------------------------------------------------|
| n/a                                 | Confirmed                                                                                                                                                                                                                                                                                      |
| <input type="checkbox"/>            | <input checked="" type="checkbox"/> The exact sample size ( $n$ ) for each experimental group/condition, given as a discrete number and unit of measurement                                                                                                                                    |
| <input type="checkbox"/>            | <input checked="" type="checkbox"/> A statement on whether measurements were taken from distinct samples or whether the same sample was measured repeatedly                                                                                                                                    |
| <input type="checkbox"/>            | <input checked="" type="checkbox"/> The statistical test(s) used AND whether they are one- or two-sided<br><i>Only common tests should be described solely by name; describe more complex techniques in the Methods section.</i>                                                               |
| <input type="checkbox"/>            | <input type="checkbox"/> A description of all covariates tested                                                                                                                                                                                                                                |
| <input type="checkbox"/>            | <input checked="" type="checkbox"/> A description of any assumptions or corrections, such as tests of normality and adjustment for multiple comparisons                                                                                                                                        |
| <input type="checkbox"/>            | <input checked="" type="checkbox"/> A full description of the statistical parameters including central tendency (e.g. means) or other basic estimates (e.g. regression coefficient) AND variation (e.g. standard deviation) or associated estimates of uncertainty (e.g. confidence intervals) |
| <input type="checkbox"/>            | <input checked="" type="checkbox"/> For null hypothesis testing, the test statistic (e.g. $F$ , $t$ , $r$ ) with confidence intervals, effect sizes, degrees of freedom and $P$ value noted<br><i>Give <math>P</math> values as exact values whenever suitable.</i>                            |
| <input checked="" type="checkbox"/> | <input type="checkbox"/> For Bayesian analysis, information on the choice of priors and Markov chain Monte Carlo settings                                                                                                                                                                      |
| <input type="checkbox"/>            | <input type="checkbox"/> For hierarchical and complex designs, identification of the appropriate level for tests and full reporting of outcomes                                                                                                                                                |
| <input type="checkbox"/>            | <input type="checkbox"/> Estimates of effect sizes (e.g. Cohen's $d$ , Pearson's $r$ ), indicating how they were calculated                                                                                                                                                                    |

*Our web collection on [statistics for biologists](#) contains articles on many of the points above.*

### Software and code

Policy information about [availability of computer code](#)

#### Data collection

HPLC: Shimadzu Corporation LabSolutions version 5.86;  
 LC-MS/MS: Mascot version 2.3.02 (Matrix Science, London, UK);  
 Western blotting imaging: Tanon MP version 1.0 (Tanon, Shanghai, China);  
 Integrated density of the Western blotting bands: ImageJ software (1.53K);  
 Glucose: SBA-40D biosensor analyzer (Institute of Biology, Shandong Academy of Sciences, Jinan, China);  
 OD600: MAPADA V-1100D spectrophotometer (MAPADA Instruments, Shanghai, China);  
 Molecular weight: on-line tool ([https://web.expasy.org/compute\\_pi/](https://web.expasy.org/compute_pi/));

#### Data analysis

Excel 2019 (Microsoft): mean, SE,  $P$  value, plotting;  
 ProteoWizard (3.0.10577): MS/MS data processing;  
 Mascot version 2.3.02 (Matrix Science, London, UK): protein identification;  
 ChemDraw 2014: chemical structure;  
 Office 2021 v2409 (Microsoft): plotting;  
 Origin 8.5 (OriginLab): plotting;  
 SPSS Statistics 19.0 (IBMA): one-way ANOVA;  
 R language version 4.3.3, R Studio 2023.12.1 Build 402: plotting, curve fitting;

For manuscripts utilizing custom algorithms or software that are central to the research but not yet described in published literature, software must be made available to editors and reviewers. We strongly encourage code deposition in a community repository (e.g. GitHub). See the Nature Portfolio [guidelines for submitting code & software](#) for further information.

## Data

Policy information about [availability of data](#)

All manuscripts must include a [data availability statement](#). This statement should provide the following information, where applicable:

- Accession codes, unique identifiers, or web links for publicly available datasets
- A description of any restrictions on data availability
- For clinical datasets or third party data, please ensure that the statement adheres to our [policy](#)

Data supporting the findings of this study are available within the paper and its Supplementary Information file. The GenBank (<https://www.ncbi.nlm.nih.gov/genbank/>) accession numbers and codon-optimized nucleotide sequences of the genes referenced in this study are provided in this paper. The mass spectrometry proteomics data have been deposited to the ProteomeXchange Consortium via the PRIDE partner repository with the dataset identifier PXD056539 (<https://www.ebi.ac.uk/pride/archive/projects/PXD056539>). Source data are provided with this paper.

## Research involving human participants, their data, or biological material

Policy information about studies with [human participants or human data](#). See also policy information about [sex, gender \(identity/presentation\), and sexual orientation](#) and [race, ethnicity and racism](#).

|                                                                    |                                 |
|--------------------------------------------------------------------|---------------------------------|
| Reporting on sex and gender                                        | No human participants involved. |
| Reporting on race, ethnicity, or other socially relevant groupings | No human participants involved. |
| Population characteristics                                         | No human participants involved. |
| Recruitment                                                        | No human participants involved. |
| Ethics oversight                                                   | No human participants involved. |

Note that full information on the approval of the study protocol must also be provided in the manuscript.

## Field-specific reporting

Please select the one below that is the best fit for your research. If you are not sure, read the appropriate sections before making your selection.

Life sciences       Behavioural & social sciences       Ecological, evolutionary & environmental sciences

For a reference copy of the document with all sections, see [nature.com/documents/nr-reporting-summary-flat.pdf](https://nature.com/documents/nr-reporting-summary-flat.pdf)

## Life sciences study design

All studies must disclose on these points even when the disclosure is negative.

|                 |                                                                                                                                                                                                                                                                                                                                                                                                                                                                                                                                                                                                                                                                |
|-----------------|----------------------------------------------------------------------------------------------------------------------------------------------------------------------------------------------------------------------------------------------------------------------------------------------------------------------------------------------------------------------------------------------------------------------------------------------------------------------------------------------------------------------------------------------------------------------------------------------------------------------------------------------------------------|
| Sample size     | No specific calculations were used to determine sample size for each experiment. This experiment was performed on bacteria fermentation and transformation for the production of chemicals, involving a large population of individual cells. All presented data represent measurements from at least 3 biological replicates, grown and performed independently. To ensure the reproducibility, some experiments were performed for several times with relevant independent replicates. For each experiment, the detailed sample sizes were stated in legend. For kinetic analysis, 3 biological replicates per substrate concentration group were performed. |
| Data exclusions | No data were excluded from our analyses.                                                                                                                                                                                                                                                                                                                                                                                                                                                                                                                                                                                                                       |
| Replication     | All the fermentations, biotransformations and enzymatic assays were performed at least three times. The exact number of independent experiments were described in the legend.                                                                                                                                                                                                                                                                                                                                                                                                                                                                                  |
| Randomization   | At least three single colonies of each recombinant strain were randomly selected from plates, each of which was subjected to independent flask cultures, batch fermentations and chemical analyses.                                                                                                                                                                                                                                                                                                                                                                                                                                                            |
| Blinding        | Blinding was not relevant to this study. We designed and carried out the experiments to achieve our goal. All samples were extracted and assayed in the same way, without any differences.                                                                                                                                                                                                                                                                                                                                                                                                                                                                     |

## Reporting for specific materials, systems and methods

We require information from authors about some types of materials, experimental systems and methods used in many studies. Here, indicate whether each material, system or method listed is relevant to your study. If you are not sure if a list item applies to your research, read the appropriate section before selecting a response.

## Materials &amp; experimental systems

## Methods

- n/a | Involved in the study
- Antibodies
- Eukaryotic cell lines
- Palaeontology and archaeology
- Animals and other organisms
- Clinical data
- Dual use research of concern
- Plants

- n/a | Involved in the study
- ChIP-seq
- Flow cytometry
- MRI-based neuroimaging

## Antibodies

Antibodies used

For Western blotting analysis, anti-Flag tag mouse monoclonal antibody (Cat. No. D191041), anti-6xHis tag mouse monoclonal antibody (Cat. No. D191001), and horseradish peroxidase-conjugated goat anti-mouse IgG (Cat. No. D110087) from Sangon Biotech (Shanghai, China) were used at 1:4000, 1:4000, and 1:5000, respectively.

Validation

All three antibodies used in this study are commercially available and validation statements are given on manufacturer's websites. The website of Cat. No. D191041, Cat. No. D191001, and Cat. No. D110087 is <https://store.sangon.com/productDetail?productInfo.code=D191041>, <https://store.sangon.com/productDetail?productInfo.code=D191001> and <https://store.sangon.com/productDetail?productInfo.code=D110087>, respectively.

## Eukaryotic cell lines

Policy information about [cell lines and Sex and Gender in Research](#)

Cell line source(s)

No eukaryotic cell lines involved.

Authentication

No eukaryotic cell lines involved.

Mycoplasma contamination

No eukaryotic cell lines involved.

Commonly misidentified lines  
(See [ICLAC](#) register)

No eukaryotic cell lines involved.

## Palaeontology and Archaeology

Specimen provenance

This study did not involve specimens.

Specimen deposition

This study did not involve specimens.

Dating methods

This study did not involve specimens.

Tick this box to confirm that the raw and calibrated dates are available in the paper or in Supplementary Information.

Ethics oversight

This study did not involve specimens.

Note that full information on the approval of the study protocol must also be provided in the manuscript.

## Animals and other research organisms

Policy information about [studies involving animals](#); [ARRIVE guidelines](#) recommended for reporting animal research, and [Sex and Gender in Research](#)

Laboratory animals

This study did not involve animals.

Wild animals

This study did not involve animals.

Reporting on sex

This study did not involve animals.

Field-collected samples

This study did not involve animals.

Ethics oversight

This study did not involve animals.

Note that full information on the approval of the study protocol must also be provided in the manuscript.

## Clinical data

Policy information about [clinical studies](#)

All manuscripts should comply with the ICMJE [guidelines for publication of clinical research](#) and a completed [CONSORT checklist](#) must be included with all submissions.

|                             |                                                                         |
|-----------------------------|-------------------------------------------------------------------------|
| Clinical trial registration | <input type="text" value="This study did not involve clinical trial."/> |
| Study protocol              | <input type="text" value="This study did not involve clinical trial."/> |
| Data collection             | <input type="text" value="This study did not involve clinical trial."/> |
| Outcomes                    | <input type="text" value="This study did not involve clinical trial."/> |

## Dual use research of concern

Policy information about [dual use research of concern](#)

### Hazards

Could the accidental, deliberate or reckless misuse of agents or technologies generated in the work, or the application of information presented in the manuscript, pose a threat to:

| No                                  | Yes                                                 |
|-------------------------------------|-----------------------------------------------------|
| <input checked="" type="checkbox"/> | <input type="checkbox"/> Public health              |
| <input checked="" type="checkbox"/> | <input type="checkbox"/> National security          |
| <input checked="" type="checkbox"/> | <input type="checkbox"/> Crops and/or livestock     |
| <input checked="" type="checkbox"/> | <input type="checkbox"/> Ecosystems                 |
| <input checked="" type="checkbox"/> | <input type="checkbox"/> Any other significant area |

### Experiments of concern

Does the work involve any of these experiments of concern:

| No                                  | Yes                                                                                                  |
|-------------------------------------|------------------------------------------------------------------------------------------------------|
| <input checked="" type="checkbox"/> | <input type="checkbox"/> Demonstrate how to render a vaccine ineffective                             |
| <input checked="" type="checkbox"/> | <input type="checkbox"/> Confer resistance to therapeutically useful antibiotics or antiviral agents |
| <input checked="" type="checkbox"/> | <input type="checkbox"/> Enhance the virulence of a pathogen or render a nonpathogen virulent        |
| <input checked="" type="checkbox"/> | <input type="checkbox"/> Increase transmissibility of a pathogen                                     |
| <input checked="" type="checkbox"/> | <input type="checkbox"/> Alter the host range of a pathogen                                          |
| <input checked="" type="checkbox"/> | <input type="checkbox"/> Enable evasion of diagnostic/detection modalities                           |
| <input checked="" type="checkbox"/> | <input type="checkbox"/> Enable the weaponization of a biological agent or toxin                     |
| <input checked="" type="checkbox"/> | <input type="checkbox"/> Any other potentially harmful combination of experiments and agents         |

## Plants

|                       |                                                                 |
|-----------------------|-----------------------------------------------------------------|
| Seed stocks           | <input type="text" value="This study did not involve plants."/> |
| Novel plant genotypes | <input type="text" value="This study did not involve plants."/> |
| Authentication        | <input type="text" value="This study did not involve plants."/> |

## ChIP-seq

### Data deposition

- Confirm that both raw and final processed data have been deposited in a public database such as [GEO](#).
- Confirm that you have deposited or provided access to graph files (e.g. BED files) for the called peaks.

Data access links

*May remain private before publication.*

This study did not involve ChIP-seq experiment.

Files in database submission

This study did not involve ChIP-seq experiment.

Genome browser session  
(e.g. [UCSC](#))

This study did not involve ChIP-seq experiment.

### Methodology

Replicates

This study did not involve ChIP-seq experiment.

Sequencing depth

This study did not involve ChIP-seq experiment.

Antibodies

This study did not involve ChIP-seq experiment.

Peak calling parameters

This study did not involve ChIP-seq experiment.

Data quality

This study did not involve ChIP-seq experiment.

Software

This study did not involve ChIP-seq experiment.

## Flow Cytometry

### Plots

Confirm that:

- The axis labels state the marker and fluorochrome used (e.g. CD4-FITC).
- The axis scales are clearly visible. Include numbers along axes only for bottom left plot of group (a 'group' is an analysis of identical markers).
- All plots are contour plots with outliers or pseudocolor plots.
- A numerical value for number of cells or percentage (with statistics) is provided.

### Methodology

Sample preparation

This study did not involve flow cytometry.

Instrument

This study did not involve flow cytometry.

Software

This study did not involve flow cytometry.

Cell population abundance

This study did not involve flow cytometry.

Gating strategy

This study did not involve flow cytometry.

- Tick this box to confirm that a figure exemplifying the gating strategy is provided in the Supplementary Information.

## Magnetic resonance imaging

### Experimental design

Design type

This study did not involve magnetic resonance imaging.

Design specifications

This study did not involve magnetic resonance imaging.

Behavioral performance measures

This study did not involve magnetic resonance imaging.

## Acquisition

Imaging type(s)

Field strength

Sequence & imaging parameters

Area of acquisition

Diffusion MRI  Used  Not used

## Preprocessing

Preprocessing software

Normalization

Normalization template

Noise and artifact removal

Volume censoring

## Statistical modeling & inference

Model type and settings

Effect(s) tested

Specify type of analysis:  Whole brain  ROI-based  Both

Statistic type for inference

(See [Eklund et al. 2016](#))

Correction

## Models & analysis

n/a | Involved in the study

Functional and/or effective connectivity

Graph analysis

Multivariate modeling or predictive analysis

Functional and/or effective connectivity

Graph analysis

Multivariate modeling and predictive analysis
